# Supplementary material
Source: PubMed Central journal article supplement (PMC8403215)
Supplement: Supp_FigS1.pdf [file Supp_FigS1.pdf]

# Systematic Reviews

## Full Search Strategy

### PubMed via NLM Search

| Search | Query                                                                                                                                                                                                                                                                                                                                                                                                                                                                                                                                                                                                                                                                                                                                                                                                                                                                                                                                                                                                                                                                                                                                                                                                                                                                                                                                      |
|--------|--------------------------------------------------------------------------------------------------------------------------------------------------------------------------------------------------------------------------------------------------------------------------------------------------------------------------------------------------------------------------------------------------------------------------------------------------------------------------------------------------------------------------------------------------------------------------------------------------------------------------------------------------------------------------------------------------------------------------------------------------------------------------------------------------------------------------------------------------------------------------------------------------------------------------------------------------------------------------------------------------------------------------------------------------------------------------------------------------------------------------------------------------------------------------------------------------------------------------------------------------------------------------------------------------------------------------------------------|
| 1      | ("Postpartum Period"[Mesh] OR postpartum[tiab] OR puerperium[tiab] OR postpartum[tiab] OR "post partum"[tiab] OR postnatal[tiab] OR post-natal[tiab] OR "post natal"[tiab]) AND ("health care"[tiab] OR healthcare[tiab] OR "patient care"[tiab] OR "health services"[tiab] OR "health system"[tiab] OR "primary care"[tiab] OR "patient visit"[tiab] OR "patient appointment"[tiab] OR follow-up[tiab] OR followup[tiab])                                                                                                                                                                                                                                                                                                                                                                                                                                                                                                                                                                                                                                                                                                                                                                                                                                                                                                                 |
| 2      | ("Postnatal Care"[Mesh] OR "postpartum care"[tw] OR "post-partum care"[tw] OR "post partum care"[tw] OR "postpartum education"[tw] OR "post-partum education"[tw] OR "post partum education"[tw] OR "postpartum visit"[tw] OR "post-partum visit"[tw] OR "post partum visit"[tw] OR "postpartum healthcare"[tw] OR "post-partum healthcare"[tw] OR "post partum healthcare"[tw] OR "postpartum health services"[tw] OR "post-partum health services"[tw] OR "post partum health services"[tw] OR "postpartum health care"[tw] OR "post-partum health care"[tw] OR "post partum health care"[tw] OR "puerperium care"[tw] OR "puerperium education"[tw] OR "puerperium visit"[tw] OR "puerperium healthcare"[tw] OR "puerperium health services"[tw] OR "puerperium health care"[tw] OR "postnatal care"[tw] OR "post-natal care"[tw] OR "post natal care"[tw] OR "postnatal education"[tw] OR "post-natal education"[tw] OR "post natal education"[tw] OR "postnatal visit"[tw] OR "post-natal visit"[tw] OR "post natal visit"[tw] OR "postnatal healthcare"[tw] OR "post-natal healthcare"[tw] OR "post natal healthcare"[tw] OR "postnatal health services"[tw] OR "post-natal health services"[tw] OR "post natal health services"[tw] OR "postnatal health care"[tw] OR "post-natal health care"[tw] OR "post natal health care"[tw]) |
| 3      | ("Patient Acceptance of Health Care"[Mesh] OR "Delivery of Health Care"[Mesh] OR "Health Services Accessibility"[Mesh] OR "Patient Reported Outcome Measures"[Mesh] OR "Quality of Health Care"[Mesh] OR "Patient Compliance"[Mesh] OR "Healthcare Disparities"[Mesh] OR disparity[tw] OR disparities[tw] OR inequalities[tw] OR inequality[tw] OR inequity[tw] OR inequities[tw] OR utilization[tiab] OR utilize[tiab] OR use[tiab] OR acceptance[tiab] OR acceptor[tiab] OR acceptability[tiab] OR availability[tiab] OR accessibility[tiab] OR access[tiab] OR accessing[tiab] OR quality[tiab] OR provide[tiab] OR providing[tiab] OR distribute[tw] OR distributing[tiab] OR receipt[tiab] OR receive[tiab] OR received[tiab] OR receiving[tiab] OR compliance[tiab] OR comply[tiab]) AND ("health care"[tiab] OR healthcare[tiab] OR "patient care"[tiab] OR "health services"[tiab] OR "health system"[tiab] OR "primary care"[tiab] OR "patient visit"[tiab] OR "patient appointment"[tiab])                                                                                                                                                                                                                                                                                                                                       |
| 4      | ("Ethnic Groups"[Mesh] OR ethnic groups[tw] OR ethnicity[tw] OR race[tw] OR "African Americans"[Mesh] OR "African Continental Ancestry Group"[Mesh] OR "Hispanic Americans"[Mesh] OR "Amish"[Mesh] OR "Arabs"[Mesh] OR "Asian Americans"[Mesh] OR "Mexican Americans"[Mesh] OR "Indians, North American"[Mesh] OR "Alaska Natives"[Mesh] OR "Inuits"[Mesh] OR "Jews"[Mesh] OR "Roma"[Mesh] OR African-Americans[tw] OR African-American[tw] OR "African Americans"[tw] OR "African American"[tw] OR Black[tw] OR Blacks[tw] OR Amish[tw] OR "Arab American"[tw] OR "Arab Americans"[tw] OR "Arabic American"[tw] OR "Arabic Americans"[tw] OR "Palestinian American"[tw] OR "Palestinian Americans"[tw] OR Muslims[tw] OR Muslim[tw] OR "Asian American"[tw] OR "Asian Americans"[tw] OR "Japanese Americans"[tw] OR "Japanese American"[tw] OR "Chinese Americans"[tw] OR "Chinese American"[tw] OR "Vietnamese                                                                                                                                                                                                                                                                                                                                                                                                                           |

# Systematic Reviews

|   |                                                                                                                                                                                                                                                                                                                                                                                                                                                                                                                                                                                                                                                                                                                                                                                                                                                                                                                                                                                                                                                                                                                                                                                                                                                                                                                                                                                                                                                                                                                                                                                                                      |
|---|----------------------------------------------------------------------------------------------------------------------------------------------------------------------------------------------------------------------------------------------------------------------------------------------------------------------------------------------------------------------------------------------------------------------------------------------------------------------------------------------------------------------------------------------------------------------------------------------------------------------------------------------------------------------------------------------------------------------------------------------------------------------------------------------------------------------------------------------------------------------------------------------------------------------------------------------------------------------------------------------------------------------------------------------------------------------------------------------------------------------------------------------------------------------------------------------------------------------------------------------------------------------------------------------------------------------------------------------------------------------------------------------------------------------------------------------------------------------------------------------------------------------------------------------------------------------------------------------------------------------|
|   | Americans"[tw] OR "Vietnamese American"[tw] OR "Asian Indian Americans"[tw] OR "Asian Indian American"[tw] OR "Cambodian Americans"[tw] OR "Cambodian American"[tw] OR "Hmong Americans"[tw] OR "Hmong American"[tw] OR "Korean Americans"[tw] OR "Korean American"[tw] OR "Filipino Americans"[tw] OR "Filipino American"[tw] OR "Spanish Americans"[tw] OR "Spanish American"[tw] OR Puerto Ricans[tw] OR "Puerto Rican"[tw] OR "Cuban Americans"[tw] OR "Cuban American"[tw] OR Latinos[tw] OR Latino[tw] OR Latinas[tw] OR Latina[tw] OR Hispanics[tw] OR Hispanic[tw] OR "Mexican American"[tw] OR "Mexican Americans"[tw] OR Chicanas[tw] OR Chicana[tw] OR Chicanos[tw] OR Chicano[tw] OR Inuit[tw] OR Kalaallit[tw] OR Inupiat[tw] OR Inupiat[tw] OR Aleuts[tw] OR Aleut[tw] OR Eskimos[tw] OR Eskimo[tw] OR "Alaska Native"[tw] OR "Alaska Natives"[tw] OR "Native Alaskans"[tw] OR "Native Alaskan"[tw] OR "Alaska's Indigenous People"[tw] OR "Alaska Indigenous People"[tw] OR "Alaska's Indigenous Peoples"[tw] OR "Alaskas Indigenous People"[tw] OR "Indigenous People of Alaska"[tw] OR "Alaska Indigenous Peoples"[tw] OR "Native American"[tw] OR "Native Americans"[tw] OR "North American Indian"[tw] OR "North American Indians"[tw] OR "North American Amerind"[tw] OR "North American Amerinds"[tw] OR "American Indians"[tw] OR "American Indian"[tw] OR Jews[tw] OR Jew[tw] OR Jewish[tw] OR Roma[tw] OR Romany[tw] OR Romani[tw] OR Romanies[tw] OR "[Minority Groups"[Mesh] OR "Minority Health"[Mesh] OR Minority[tw] OR Minorities[tw] OR "people of color"[tw] OR people-of-color[tw]) |
| 5 | ("Medicaid"[Mesh] OR "Medicare"[Mesh] OR Medicaid[tw] OR Medicare[tw] OR "Medical Assistance"[tw] OR "Medically Uninsured"[Mesh] OR uninsured[tw] OR underinsured[tw] OR uninsurable[tw] OR insurance status[tw] OR income level[tw] OR "Uncompensated Care"[Mesh] OR "uncompensated care"[tw] OR "Poverty"[Mesh] OR poverty[tw] OR impoverished[tw] OR low-income[tw] OR "low income"[tw] OR single-mother[tw] OR "single mother"[tw] OR single-mothers[tw] OR "single mothers"[tw] OR disadvantaged[tw] OR "Medical Indigency"[Mesh] OR indigent[tw] OR indigents[tw] OR indigency[tw] OR indigencies[tw] OR "Homeless Persons"[Mesh] OR homeless[tw] OR homelessness[tw] OR "Socioeconomic Factors"[Mesh] OR "socioeconomic factors"[tw] OR "socioeconomic factor"[tw] OR "socioeconomic status"[tw] OR "occupational status" OR "economic status"[tw] OR "social class"[tw] OR "Sociology, Medical"[Mesh] OR medical sociology[tw] OR "sociology of medicine"[tw] OR underserve[tw] OR underserved[tw] OR underrepresent[tw] OR under-represent[tw] OR under-represented[tw] OR under-represented[tw] OR marginalize[tw] OR marginalized[tw])                                                                                                                                                                                                                                                                                                                                                                                                                                                                    |
| 6 | 1 OR 2                                                                                                                                                                                                                                                                                                                                                                                                                                                                                                                                                                                                                                                                                                                                                                                                                                                                                                                                                                                                                                                                                                                                                                                                                                                                                                                                                                                                                                                                                                                                                                                                               |
| 7 | 4 OR 5                                                                                                                                                                                                                                                                                                                                                                                                                                                                                                                                                                                                                                                                                                                                                                                                                                                                                                                                                                                                                                                                                                                                                                                                                                                                                                                                                                                                                                                                                                                                                                                                               |
| 8 | 3 AND 6 AND 7                                                                                                                                                                                                                                                                                                                                                                                                                                                                                                                                                                                                                                                                                                                                                                                                                                                                                                                                                                                                                                                                                                                                                                                                                                                                                                                                                                                                                                                                                                                                                                                                        |

## CINAHL Plus via EBSCO Search

| Search | Query                                                                                                                                                                                                                                                                                                                                                                                                                                                                                                                                                                                                                                                                                                             |
|--------|-------------------------------------------------------------------------------------------------------------------------------------------------------------------------------------------------------------------------------------------------------------------------------------------------------------------------------------------------------------------------------------------------------------------------------------------------------------------------------------------------------------------------------------------------------------------------------------------------------------------------------------------------------------------------------------------------------------------|
| 1      | ((MH "Postnatal Period+") OR TI postpartum OR AB postpartum OR TI puerperium OR AB puerperium OR TI post-partum OR AB post-partum OR TI "post partum" OR AB "post partum" OR TI postnatal OR AB postnatal OR TI post-natal OR AB post-natal OR TI "post natal" OR AB "post natal") AND (TI "health care" OR AB "health care" OR TI healthcare OR AB healthcare OR TI "patient care" OR AB "patient care" OR TI "health services" OR AB "health services" OR TI "health system" OR AB "health system" OR TI "primary care" OR AB "primary care" OR TI "patient visit" OR AB "patient visit" OR TI "patient appointment" OR AB "patient appointment" OR TI follow-up OR AB follow-up OR TI followup OR AB followup) |

# Systematic Reviews

|   |                                                                                                                                                                                                                                                                                                                                                                                                                                                                                                                                                                                                                                                                                                                                                                                                                                                                                                                                                                                                                                                                                                                                                                                                                                                                                                                                                                                                                                                                                                                                                                                                                                                                                                                                                                                                                                                                                                        |
|---|--------------------------------------------------------------------------------------------------------------------------------------------------------------------------------------------------------------------------------------------------------------------------------------------------------------------------------------------------------------------------------------------------------------------------------------------------------------------------------------------------------------------------------------------------------------------------------------------------------------------------------------------------------------------------------------------------------------------------------------------------------------------------------------------------------------------------------------------------------------------------------------------------------------------------------------------------------------------------------------------------------------------------------------------------------------------------------------------------------------------------------------------------------------------------------------------------------------------------------------------------------------------------------------------------------------------------------------------------------------------------------------------------------------------------------------------------------------------------------------------------------------------------------------------------------------------------------------------------------------------------------------------------------------------------------------------------------------------------------------------------------------------------------------------------------------------------------------------------------------------------------------------------------|
| 2 | <p>((MH "Postnatal Care+") OR "postpartum care" OR "post-partum care" OR "post partum care" OR "postpartum education" OR "post-partum education" OR "post partum education" OR "postpartum visit" OR "post-partum visit" OR "post partum visit" OR "postpartum healthcare" OR "post-partum healthcare" OR "post partum healthcare" OR "postpartum health services" OR "post-partum health services" OR "post partum health services" OR "postpartum health care" OR "post-partum health care" OR "post partum health care" OR "puerperium care" OR "puerperium education" OR "puerperium visit" OR "puerperium healthcare" OR "puerperium health services" OR "puerperium health care" OR "postnatal care" OR "post-natal care" OR "post natal care" OR "postnatal education" OR "post-natal education" OR "post natal education" OR "postnatal visit" OR "post-natal visit" OR "post natal visit" OR "postnatal healthcare" OR "post-natal healthcare" OR "post natal healthcare" OR "postnatal health services" OR "post-natal health services" OR "post natal health services" OR "postnatal health care" OR "post-natal health care" OR "post natal health care")</p>                                                                                                                                                                                                                                                                                                                                                                                                                                                                                                                                                                                                                                                                                                                              |
| 3 | <p>((MH "Health Care Delivery+") OR (MH "Health Services Accessibility+") OR (MH "Patient-Reported Outcomes+") OR (MH "Quality of Health Care+") OR (MH "Patient Compliance+") OR (MH "Healthcare Disparities+") OR disparity OR disparities OR inequalities OR inequality OR inequity OR inequities OR TI utilization OR AB utilization OR TI utilize OR AB utilize OR TI use OR AB use OR TI acceptance OR AB acceptance OR TI acceptor OR AB acceptor OR TI acceptability OR AB acceptability OR TI availability OR AB availability OR TI accessibility OR AB accessibility OR TI access OR AB access OR TI accessing OR AB accessing OR TI quality OR AB quality OR TI provide OR AB provide OR TI providing OR AB providing OR distribute OR TI distributing OR AB distributing OR TI receipt OR AB receipt OR TI receive OR AB receive OR TI received OR AB received OR TI receiving OR AB receiving OR TI compliance OR AB compliance OR TI comply OR AB comply) AND (TI "health care" OR AB "health care" OR TI healthcare OR AB healthcare OR TI "patient care" OR AB "patient care" OR TI "health services" OR AB "health services" OR TI "health system" OR AB "health system" OR TI "primary care" OR AB "primary care" OR TI "patient visit" OR AB "patient visit" OR TI "patient appointment" OR AB "patient appointment")</p>                                                                                                                                                                                                                                                                                                                                                                                                                                                                                                                                                           |
| 4 | <p>((MH "Ethnic Groups+") OR "ethnic groups" OR ethnicity OR race OR racial OR (MH "Blacks+") OR (MH "Hispanics+") OR (MH "Amish+") OR (MH "Arabs+") OR (MH "Asians+") OR (MH "Inuit+") OR (MH "Eskimos+") OR (MH "Jews+") OR African-Americans OR African-American OR "African Americans" OR "African American" OR Black OR Blacks OR Amish OR "Arab American" OR "Arab Americans" OR "Arabic American" OR "Arabic Americans" OR "Palestinian American" OR "Palestinian Americans" OR Muslims OR Muslim OR "Asian American" OR "Asian Americans" OR "Japanese Americans" OR "Japanese American" OR "Chinese Americans" OR "Chinese American" OR "Vietnamese Americans" OR "Vietnamese American" OR "Asian Indian Americans" OR "Asian Indian American" OR "Cambodian Americans" OR "Cambodian American" OR "Hmong Americans" OR "Hmong American" OR "Korean Americans" OR "Korean American" OR "Filipino Americans" OR "Filipino American" OR "Spanish Americans" OR "Spanish American" OR "Puerto Ricans" OR "Puerto Rican" OR "Cuban Americans" OR "Cuban American" OR Latinos OR Latino OR Latinas OR Latina OR Hispanics OR Hispanic OR "Mexican American" OR "Mexican Americans" OR Chicanas OR Chicana OR Chicanos OR Chicano OR Inuit OR Kalaallits OR Kalaallit OR Inupiat OR Inupiat OR Aleuts OR Aleut OR Eskimos OR Eskimo OR "Alaska Native" OR "Alaska Natives" OR "Native Alaskans" OR "Native Alaskan" OR "Alaska's Indigenous People" OR "Alaska Indigenous People" OR "Alaska's Indigenous Peoples" OR "Alaskas Indigenous People" OR "Indigenous People of Alaska" OR "Alaska Indigenous Peoples" OR "Native American" OR "Native Americans" OR "North American Indian" OR "North American Indians" OR "North American Amerind" OR "North American Amerinds" OR "American Indians" OR "American Indian" OR Jews OR Jew OR Jewish OR Roma OR Romany OR Romani OR Romanies OR (MH</p> |

# Systematic Reviews

|   |                                                                                                                                                                                                                                                                                                                                                                                                                                                                                                                                                                                                                                                                                                                                                                                                                                                                                                                                                                                                             |
|---|-------------------------------------------------------------------------------------------------------------------------------------------------------------------------------------------------------------------------------------------------------------------------------------------------------------------------------------------------------------------------------------------------------------------------------------------------------------------------------------------------------------------------------------------------------------------------------------------------------------------------------------------------------------------------------------------------------------------------------------------------------------------------------------------------------------------------------------------------------------------------------------------------------------------------------------------------------------------------------------------------------------|
|   | "Minority Groups+") OR Minority OR Minorities OR "people of color" OR people-of-color)                                                                                                                                                                                                                                                                                                                                                                                                                                                                                                                                                                                                                                                                                                                                                                                                                                                                                                                      |
| 5 | ((MH "Medicaid+") OR (MH "Medicare+") OR Medicaid OR Medicare OR "Medical Assistance" OR (MH "Medically Uninsured+") OR uninsured OR underinsured OR uninsurable OR "insurance status" OR "income level" OR (MH "Uncompensated Care+") OR "uncompensated care" OR (MH "Poverty+") OR (MH "Poverty Areas+") OR poverty OR impoverished OR low-income OR "low income" OR single-mother OR "single mother" OR single-mothers OR "single mothers" OR disadvantaged OR (MH "Indigent Persons+") OR indigent OR indigents OR indigency OR indigencies OR (MH "Homelessness") OR (MH "Homeless Persons") OR homeless OR homelessness OR (MH "Socioeconomic Factors+") OR "socioeconomic factors" OR "socioeconomic factor" OR "socioeconomic status" OR "occupational status" OR "economic status" OR "social class" OR "medical sociology" OR "sociology of medicine" OR underserve OR underserved OR underrepresent OR under-represent OR under-represented OR under-represented OR marginalize OR marginalized) |
| 6 | 1 OR 2                                                                                                                                                                                                                                                                                                                                                                                                                                                                                                                                                                                                                                                                                                                                                                                                                                                                                                                                                                                                      |
| 7 | 4 OR 5                                                                                                                                                                                                                                                                                                                                                                                                                                                                                                                                                                                                                                                                                                                                                                                                                                                                                                                                                                                                      |
| 8 | 3 AND 6 AND 7                                                                                                                                                                                                                                                                                                                                                                                                                                                                                                                                                                                                                                                                                                                                                                                                                                                                                                                                                                                               |

# Systematic Reviews

## Web of Science Core Collection (via Clarivate Analytics) Search

| Search | Query                                                                                                                                                                                                                                                                                                                                                                                                                                                                                                                                                                                                                                                                                                                                                                                                                                                                                                                                                                                                                                                                                                                                                                                                                                                                                                                                                                                                                                                                                                                                                                                                                                                                                                                                                                    |
|--------|--------------------------------------------------------------------------------------------------------------------------------------------------------------------------------------------------------------------------------------------------------------------------------------------------------------------------------------------------------------------------------------------------------------------------------------------------------------------------------------------------------------------------------------------------------------------------------------------------------------------------------------------------------------------------------------------------------------------------------------------------------------------------------------------------------------------------------------------------------------------------------------------------------------------------------------------------------------------------------------------------------------------------------------------------------------------------------------------------------------------------------------------------------------------------------------------------------------------------------------------------------------------------------------------------------------------------------------------------------------------------------------------------------------------------------------------------------------------------------------------------------------------------------------------------------------------------------------------------------------------------------------------------------------------------------------------------------------------------------------------------------------------------|
| 1      | (postpartum OR puerperium OR post-partum OR "post partum" OR postnatal OR post-natal OR "post natal") AND ("health care" OR healthcare OR "patient care" OR "health services" OR "health system" OR "primary care" OR "patient visit" OR "patient appointment" OR follow-up OR followup)                                                                                                                                                                                                                                                                                                                                                                                                                                                                                                                                                                                                                                                                                                                                                                                                                                                                                                                                                                                                                                                                                                                                                                                                                                                                                                                                                                                                                                                                                 |
| 2      | ("postpartum care" OR "post-partum care" OR "post partum care" OR "postpartum education" OR "post-partum education" OR "post partum education" OR "postpartum visit" OR "post-partum visit" OR "post partum visit" OR "postpartum healthcare" OR "post-partum healthcare" OR "post partum healthcare" OR "postpartum health services" OR "post-partum health services" OR "post partum health services" OR "postpartum health care" OR "post-partum health care" OR "post partum health care" OR "puerperium care" OR "puerperium education" OR "puerperium visit" OR "puerperium healthcare" OR "puerperium health services" OR "puerperium health care" OR "postnatal care" OR "post-natal care" OR "post natal care" OR "postnatal education" OR "post-natal education" OR "post natal education" OR "postnatal visit" OR "post-natal visit" OR "post natal visit" OR "postnatal healthcare" OR "post-natal healthcare" OR "post natal healthcare" OR "postnatal health services" OR "post-natal health services" OR "post natal health services" OR "postnatal health care" OR "post-natal health care" OR "post natal health care")                                                                                                                                                                                                                                                                                                                                                                                                                                                                                                                                                                                                                                 |
| 3      | (disparity OR disparities OR inequalities OR inequality OR inequity OR inequities OR utilization OR utilize OR use OR acceptance OR acceptor OR acceptability OR availability OR accessibility OR access OR accessing OR quality OR provide OR providing OR distribute OR distributing OR receipt OR receive OR received OR receiving OR compliance OR comply) AND ("health care" OR healthcare OR "patient care" OR "health services" OR "health system" OR "primary care" OR "patient visit" OR "patient appointment")                                                                                                                                                                                                                                                                                                                                                                                                                                                                                                                                                                                                                                                                                                                                                                                                                                                                                                                                                                                                                                                                                                                                                                                                                                                 |
| 4      | ("ethnic groups" OR ethnicity OR race OR racial OR African-Americans OR African-American OR "African Americans" OR "African American" OR Black OR Blacks OR Amish OR "Arab American" OR "Arab Americans" OR "Arabic American" OR "Arabic Americans" OR "Palestinian American" OR "Palestinian Americans" OR Muslims OR Muslim OR "Asian American" OR "Asian Americans" OR "Japanese Americans" OR "Japanese American" OR "Chinese Americans" OR "Chinese American" OR "Vietnamese Americans" OR "Vietnamese American" OR "Asian Indian Americans" OR "Asian Indian American" OR "Cambodian Americans" OR "Cambodian American" OR "Hmong Americans" OR "Hmong American" OR "Korean Americans" OR "Korean American" OR "Filipino Americans" OR "Filipino American" OR "Spanish Americans" OR "Spanish American" OR "Puerto Ricans" OR "Puerto Rican" OR "Cuban Americans" OR "Cuban American" OR Latinos OR Latino OR Latinas OR Latina OR Hispanics OR Hispanic OR "Mexican American" OR "Mexican Americans" OR Chicanas OR Chicana OR Chicanos OR Chicano OR Inuit OR Kalaallits OR Kalaallit OR Inupiat OR Aleuts OR Aleut OR Eskimos OR Eskimo OR "Alaska Native" OR "Alaska Natives" OR "Native Alaskans" OR "Native Alaskan" OR "Alaska's Indigenous People" OR "Alaska Indigenous People" OR "Alaska's Indigenous Peoples" OR "Alaskas Indigenous People" OR "Indigenous People of Alaska" OR "Alaska Indigenous Peoples" OR "Native American" OR "Native Americans" OR "North American Indian" OR "North American Indians" OR "North American Amerind" OR "North American Amerinds" OR "American Indians" OR "American Indian" OR Jews OR Jew OR Jewish OR Roma OR Romany OR Romani OR Romanies OR Minority OR Minorities OR "people of color" OR people-of-color) |
| 5      | (Medicaid OR Medicare OR "Medical Assistance" OR "Medically Uninsured" OR uninsured OR underinsured OR uninsurable OR "insurance status" OR "income level" OR "uncompensated care" OR poverty OR impoverished OR low-income OR "low income" OR single-mother OR                                                                                                                                                                                                                                                                                                                                                                                                                                                                                                                                                                                                                                                                                                                                                                                                                                                                                                                                                                                                                                                                                                                                                                                                                                                                                                                                                                                                                                                                                                          |

# Systematic Reviews

|   |                                                                                                                                                                                                                                                                                                                                                                                                                                                                                                      |
|---|------------------------------------------------------------------------------------------------------------------------------------------------------------------------------------------------------------------------------------------------------------------------------------------------------------------------------------------------------------------------------------------------------------------------------------------------------------------------------------------------------|
|   | "single mother" OR single-mothers OR "single mothers" OR disadvantaged OR indigent OR indigents OR indigency OR indigencies OR homeless OR homelessness OR "socioeconomic factors" OR "socioeconomic factor" OR "socioeconomic status" OR "economic status" OR "occupational status" OR "social class" OR "medical sociology" OR "sociology of medicine" OR underserve OR underserved OR underrepresent OR under-represent OR under-represented OR under-represented OR marginalize OR marginalized) |
| 6 | 1 OR 2                                                                                                                                                                                                                                                                                                                                                                                                                                                                                               |
| 7 | 4 OR 5                                                                                                                                                                                                                                                                                                                                                                                                                                                                                               |
| 8 | 3 AND 6 AND 7                                                                                                                                                                                                                                                                                                                                                                                                                                                                                        |

## ClinicalTrials.gov Search

| Search | Query                                                                                                                                                                                                                                                       |
|--------|-------------------------------------------------------------------------------------------------------------------------------------------------------------------------------------------------------------------------------------------------------------|
| 1      | (postpartum OR puerperium OR post-partum OR postnatal OR post-natal) AND (care OR healthcare OR "health services" OR "health system" OR visit OR appointment OR follow-up OR followup)                                                                      |
| 2      | ("ethnic group" OR ethnicity OR race OR racial OR minority OR minorities OR Medicaid OR Medicare OR uninsured OR underrepresented OR marginalized OR low-income OR "low income" OR poverty OR indigent OR indigency OR homeless OR socioeconomic OR status) |
| 3      | 1 AND 2                                                                                                                                                                                                                                                     |
